# Supplementary material
Source: PubMed Central journal article supplement (PMC5392416)
Supplement: NIHMS855616-supplement-Figure_1_Permission__ref_61_.pdf [file NIHMS855616-supplement-Figure_1_Permission__ref_61_.pdf]

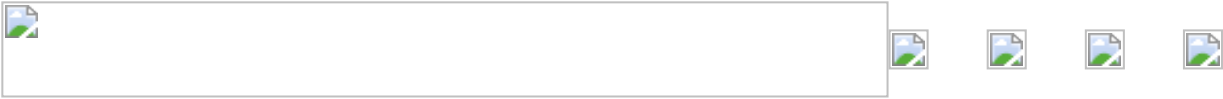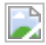

**Title:** Rationale, application and clinical qualification for NT-proBNP as a surrogate end point in pivotal clinical trials in patients with AL amyloidosis

**Author:** G Merlini, I Lousada, Y Ando, A Dispenzieri, M A Gertz et al.

**Publication:** Leukemia

**Publisher:** Nature Publishing Group

**Date:** Jul 15, 2016

Copyright © 2016, Rights Managed by Nature Publishing Group

Logged in as:  
Mathew Maurer  
Account #:  
3001097782

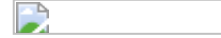

### Creative Commons

The article for which you have requested permission has been distributed under a Creative Commons CC-BY license (please see the article itself for the license version number). You may reuse this material without obtaining permission from Nature Publishing Group, providing that the author and the original source of publication are fully acknowledged, as per the terms of the license.

For license terms, please see <http://creativecommons.org/>

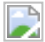

Are you the author of this NPG article?

To order reprints of this content, please contact the Nature Publishing Group reprint office by e-mail: [reprints@nature.com](mailto:reprints@nature.com).

Copyright © 2017 [Copyright Clearance Center, Inc.](#) All Rights Reserved. [Privacy statement](#).  
Terms and Conditions.

Comments? We would like to hear from you. E-mail us at [customercare@copyright.com](mailto:customercare@copyright.com)
