# Supplementary material
Source: PubMed Central journal article supplement (PMC5392416)
Supplement: NIHMS855616-supplement-Figure_2_and_3_Permission.pdf [file NIHMS855616-supplement-Figure_2_and_3_Permission.pdf]

Emily Picillo  
Managing Editor  
Circulation  
200 Fifth Avenue  
Suite 1020  
Waltham, MA 02451  
[epicillo@circulationjournal.org](mailto:epicillo@circulationjournal.org)

23<sup>rd</sup> February, 2017

Dear Ms Picillo,

**Re: Circulation: CIRCULATIONAHA/2016/024438R2 (Addressing Common Questions Encountered in the Diagnosis and Management of Cardiac Amyloidosis.**

I confirm that I give permission for the following images to be published in the above article:

*Figure 2: Sequence of still images showing typical echocardiographic features of cardiac amyloidosis. **Images courtesy of Professor Elliott, University College London, UK.***

*Figure 3:  
**Upper left and upper right panel courtesy of Professor Elliott, University College London, UK***

Yours sincerely,



Perry Elliott
