# Supplementary material
Source: PubMed Central journal article supplement (PMC5392416)
Supplement: NIHMS855616-supplement-Supplemental_Tables.pdf [file NIHMS855616-supplement-Supplemental_Tables.pdf]

## SUPPLEMENTAL MATERIAL

**Supplementary Table 1: Therapies and Outcomes for Newly Diagnosed AL Patients**

| <b>Therapy</b>                  | <b>Trial<br/>or<br/>Series</b> | <b>N</b> | <b>Deaths within<br/>100 days (%)</b> | <b>CR + VGPR<br/>(%)</b> | <b>PFS<br/>(yrs)</b> | <b>OS<br/>(yrs)</b> | <b>Cardiac/Renal<br/>Responses<br/>(%)</b> |
|---------------------------------|--------------------------------|----------|---------------------------------------|--------------------------|----------------------|---------------------|--------------------------------------------|
| SCT <sup>1</sup>                | Series                         | 421      | 11.4                                  | CR = 34                  | 2.6                  | 6.3                 | NR                                         |
| SCT+ BorDex <sup>2</sup>        | Trial<br>(NCT004588<br>22)     | 41       | 10                                    | CR = 58                  | NR                   |                     | 52/53                                      |
| CyBorD <sup>3</sup>             | Series                         | 230      | 13                                    | 43                       | 1.1                  | > 5                 | 17/23                                      |
| CTD <sup>4</sup>                | Series                         | 69       | NR                                    | 46                       | 1.2                  | NR                  | 19/39                                      |
| Oral Melphalan/Dex <sup>5</sup> | Trial                          | 46       | 0                                     | CR = 33                  | 3.8                  | 5.1                 | 19/48                                      |

Bor = bortezomib; CR = complete hematologic response; Cy = oral cyclophosphamide; D or Dex = dexamethasone; NR = not reported; OS = overall survival; PFS = progression-free survival; SCT = stem cell transplant

**Supplementary Table 2: Clinical Trials for TTR Amyloidosis**

| Agent             | Patient Population                                              | Citation/<br>NCT # | Phase        | Design                                                    | Enrollment<br>(N) | Exposure                                                                 | Primary Outcome                                                                                          | Efficacy                                                                                                                                                                                                                                                                                                                 | Safety                                                                                                                                     |
|-------------------|-----------------------------------------------------------------|--------------------|--------------|-----------------------------------------------------------|-------------------|--------------------------------------------------------------------------|----------------------------------------------------------------------------------------------------------|--------------------------------------------------------------------------------------------------------------------------------------------------------------------------------------------------------------------------------------------------------------------------------------------------------------------------|--------------------------------------------------------------------------------------------------------------------------------------------|
| <b>Diflunisal</b> | ATTRm with peripheral neuropathy (~50% had cardiac involvement) | <sup>6,7</sup>     | Phase III    | Multicenter, Randomized Double Blind Placebo Controlled   | 130               | Diflunisal 250 mg PO BID (n=64) vs. Placebo (n=66) for 24 months         | NIS+7 at 24 months                                                                                       | Mean NIS+7 difference between diflunisal and placebo of 16.3 points, P<0.001<br><br>Mean SF-36 physical and mental scores improved with diflunisal but deteriorated with placebo<br><br>No significant reduction in LV wall thickness or longitudinal strain in patients with cardiac involvement compared with placebo. | Similar SAEs in both groups.<br><br>Did not observe a significant rate of GI bleed or volume overload.                                     |
|                   | ATTRwt and ATTRmt cardiac amyloidosis                           | <sup>8</sup>       | Phase II     | Single Center Open label Non-randomized                   | 13                | Diflunisal 250 mg PO BID                                                 | Changes in LVEF, MCF and LV Mass.<br><br>Changes in hemoglobin, creatinine, mBMI                         | No change in LVEF, LV mass or Myocardial contraction fraction.                                                                                                                                                                                                                                                           | Stable hemoglobin and platelet counts<br><br>Decline in eGFR of 6% (non-significant) which was related to duration of diflunisal exposure. |
| <b>Tafamidis</b>  | Val30Met, Stage I, ATTR-FAP                                     | <sup>9</sup>       | Phase II/III | Multicenter, Randomized, Double Blind, Placebo controlled | 128               | 1:1 allocation to tafamidis 20 mg (n=65) or placebo (n=63) for 18 months | Co-primary: NIS-LL response and Total QoL by the Norfolk Quality of Life-Diabetic Neuropathy total score | Intention to treat: NIS-LL responders with Tafamidis (45.3%) vs. placebo (25.9%): p=0.068<br><br>Efficacy Evaluable: Tafamidis (60.0%) vs. placebo (38.1%), p=0.041.<br><br>Intention to treat TQoL change Tafamidis 2.0 vs. placebo 7.2, p=0.116),<br><br>Efficacy Evaluable: Tafamidis 0.1 vs placebo 8.9, p=0.045)    | SAEs (8-9%) and AEs did not differ<br><br>Higher rate of UTI, vaginal infections and diarrhea in tafamidis arm                             |

|  |                                          |               |                  |                                        |    |                               |                                                   |                                                                                                                                                                                                                                                                                                                                                                         |                                                                                                   |
|--|------------------------------------------|---------------|------------------|----------------------------------------|----|-------------------------------|---------------------------------------------------|-------------------------------------------------------------------------------------------------------------------------------------------------------------------------------------------------------------------------------------------------------------------------------------------------------------------------------------------------------------------------|---------------------------------------------------------------------------------------------------|
|  | Same as above                            | <sup>10</sup> | Phase III/IV-OLE | Open label extension for 12 months     | 86 | Tafamidis 20 mg               | NIS-LL, QOL, neurologic function and mBMI         | <p>Stable NIS-LL and TQOL in those that continued on tafamidis.</p> <p>Decline in NIS-LL (from 0.34 to 0.16/month; p = 0.01) and TQOL score (from 0.61 to -0.16; p &lt; 0.001) in those that switched to tafamidis from placebo.</p> <p>Early treatment with tafamidis was associated with 55.9 % greater preservation of neurologic function than later treatment.</p> | No new safety signal during longer term use                                                       |
|  | Non-Val30Met and Non-Val122Ile Mutations | <sup>11</sup> | Phase II         | Multicenter, Open label Non randomized | 21 | Tafamidis 20 mg for 12 months | TTR stabilization at 6 weeks compared to baseline | <p>TTR stabilization in 94.7% at 6 weeks.</p> <p>NIS score worsened at month 12</p> <p>No change in QoL or mBMI at month 12</p>                                                                                                                                                                                                                                         | <p>SAE in 4 subjects</p> <p>Most common AE were falls, diarrhea and extremity pain</p>            |
|  | ATTRwt (n=31) and Val122Ile (n=4)        | <sup>12</sup> | Phase II         | Multicenter Open label Non-randomized  | 35 | Tafamidis 20 mg for 12 months | TTR stabilization at 6 weeks compared to baseline | <p>TTR stabilization in 97.1% at week 6</p> <p>48.4% had clinical progression</p> <p>NT-pro-BNP levels did not increase significantly, troponin I and troponin T increased moderately</p> <p>No consistent clinically relevant changes were seen in echocardiographic cardiac assessments</p>                                                                           | Tafamidis treatment was generally well tolerated although 7 of 31 patients had bouts of diarrhea. |
|  | Same as above                            | <sup>13</sup> | Phase II-OLE     | Multicenter Open label Non-randomized  | 31 | Tafamidis 20 mg               | Clinical events, biomarkers and                   | <p>Survival of 49% at five years.</p> <p>Stable biomarkers and echocardiographic measures till</p>                                                                                                                                                                                                                                                                      | No new safety signals, well tolerated.                                                            |

|                  |                                  |               |           |                                                                          |     |                                                                         |                                                                                                                 |                                                                                                                                                                                                                                                 |                                                                                                                                                           |
|------------------|----------------------------------|---------------|-----------|--------------------------------------------------------------------------|-----|-------------------------------------------------------------------------|-----------------------------------------------------------------------------------------------------------------|-------------------------------------------------------------------------------------------------------------------------------------------------------------------------------------------------------------------------------------------------|-----------------------------------------------------------------------------------------------------------------------------------------------------------|
|                  |                                  |               |           |                                                                          |     |                                                                         |                                                                                                                 | 36 months                                                                                                                                                                                                                                       |                                                                                                                                                           |
|                  | ATTRm with Stage $\geq$ 2 FAP    | <sup>14</sup> | Phase II  | Single Center<br>Open label<br>Non-randomized                            | 37  | Tafamidis 20 mg for 12 months                                           | NIS-LL and NIS-UL scores and disability scores.                                                                 | 93% of patients deteriorated on disability or NIS parameters                                                                                                                                                                                    | AEs included febrile UTIs, diarrhea and fecal incontinence                                                                                                |
|                  | ATTRm and ATTRwt Cardiac amyloid | NCT 01994889  | Phase III | Multicenter, International, Double-Blind, Placebo-Controlled, Randomized | 441 | Tafamidis 20mg or 80mg for 30 months<br>Placebo PO QD x 30 months       | All-cause mortality and frequency of cardiovascular-related hospitalization                                     | Discontinued development of drug                                                                                                                                                                                                                | N/A                                                                                                                                                       |
| <b>Patisiran</b> | Healthy Volunteers               | <sup>15</sup> | Phase 1   | Dose Escalation study<br>Placebo controlled                              | 17  | Patisiran 0.01 – 0.5 mg/kg or placebo                                   | Safety, Pharmacokinetics<br>Pharmacodynamics                                                                    | Dose-dependent reductions in serum TTR with patisiran<br>Maximal TTR mean knockdown of ~ 90% with single dose of patisiran 0.3 – 0.5 mg/kg                                                                                                      | No SAEs reported<br><br>Skin erythema was most common AE but did not differ between patisiran 46% and placebo 50%.                                        |
|                  | ATTRm FAP Stage I or II          | <sup>16</sup> | Phase II  | Dose Escalation                                                          | 29  | Patisiran at 0.01 – 0.3 mg/kg every 4 weeks and 0.3 mg/kg every 3 weeks | Safety, Pharmacokinetics<br>Pharmacodynamics                                                                    | Dose-dependent reductions in serum TTR following 2 doses of Patisiran.<br><br>Mean maximal TTR knockdown of ~85% with two doses of Patisiran 0.3 mg/kg.<br><br>TTR knockdown not affected by concurrent use of Diflunisal or Tafamidis          | SAE observed in 1 patient at 0.3 mg/kg dose<br><br>No significant lab abnormalities.<br><br>Most common AEs were infusion-related reactions (10% overall) |
|                  | ATTRm FAP Stage I or II          | <sup>17</sup> | Phase II  | OLE                                                                      | 28  | Patisiran at 0.3mg/kg every 2 weeks for 2 years                         | Safety and tolerability. mNIS+7, NIS, cardiac involvement, autonomic symptoms, QoL (EQ-5D) and serum TTR levels | TTR mean knockdown at 87% and sustained over 18 months<br><br>Decrease in mNIS+7 of 0.8 points at 18 months<br><br>Those with associated cardiomyopathy (N=11) showed stability in their echocardiographic, biomarker, and functional measures, | Infusion-related reactions in 18.5% of patients<br><br>SAEs in 3 patients but not related to study drug)<br><br>No significant lab abnormalities          |

|                                                                                                     |                                           |                 |         |                                                                                      |     |                                                                                            |                                                                                            |                                                                                                                                                                                                                                    |                                                                                                                                                                                                                                                                                                                                                                             |
|-----------------------------------------------------------------------------------------------------|-------------------------------------------|-----------------|---------|--------------------------------------------------------------------------------------|-----|--------------------------------------------------------------------------------------------|--------------------------------------------------------------------------------------------|------------------------------------------------------------------------------------------------------------------------------------------------------------------------------------------------------------------------------------|-----------------------------------------------------------------------------------------------------------------------------------------------------------------------------------------------------------------------------------------------------------------------------------------------------------------------------------------------------------------------------|
|                                                                                                     |                                           |                 |         |                                                                                      |     |                                                                                            |                                                                                            | including 10-meter-walk speed.                                                                                                                                                                                                     |                                                                                                                                                                                                                                                                                                                                                                             |
|                                                                                                     | ATTRm FAP<br>NIS ranging<br>from 5-130    | NCT<br>01960348 | Phase 3 | Multicenter,<br>Multinational,<br>Randomized,<br>Double-blind,<br>Placebo-controlled | 225 | ALN-TTR02 IV<br>infusion vs Normal<br>Saline IV infusion<br>2:1 allocation to<br>patisiran | Difference between<br>ALN-TTR02 and<br>placebo in the change<br>from baseline of<br>mNIS+7 | Anticipated 2017                                                                                                                                                                                                                   | N/A                                                                                                                                                                                                                                                                                                                                                                         |
| <b>Reusiran</b><br><b><i>Discontinued</i></b><br><b><i>development</i></b><br><b><i>of drug</i></b> | Healthy<br>Volunteers                     | <sup>18</sup>   | Phase 1 | Dose escalation                                                                      | 41  | Reusiran 1.25–10<br>mg/kg SQ as single<br>or multiple doses                                | Safety,<br>Pharmacokinetics<br>Pharmacodynamics                                            | Dose-dependent TTR knockdown<br>Mean maximal TTR knockdown<br>of ~90% with multiple dosing of<br>Reusiran 7.5-or 10 mg/kg                                                                                                          | No SAEs and no significant<br>laboratory abnormalities<br><br>Mild to moderate infusion-related<br>reactions were most common AEs.                                                                                                                                                                                                                                          |
|                                                                                                     | ATTRm and<br>ATTRwt<br>Cardiac<br>amyloid | <sup>19</sup>   | Phase 2 | Open label                                                                           | 26  | Reusiran at 500<br>mg x 5 days SQ,<br>then every week for<br>5 weeks                       | Pharmacodynamics<br>Echo, 6MWT, NYHA,<br>CMR, NT-proBNP,<br>KCCQ, EQ-5D                    | Knockdown of serum TTR levels<br>by ~ 90% with multiple dosing,<br>which was similar in ATTRwt and<br>ATTRm.<br><br>Echo, MRI, biomarkers and<br>6MWD stable to day 90                                                             | All treatment related AEs of mild<br>intensity<br><br>No significant laboratory<br>abnormalities observed<br><br>Transient injection-site reactions in<br>23% of patients                                                                                                                                                                                                   |
|                                                                                                     | ATTRm and<br>ATTRwt<br>Cardiac<br>amyloid |                 | Phase 2 | Open label<br>extension                                                              | 25  | Reusiran at 500<br>mg/week<br><br>Apply to dose<br>reduce to 250<br>mg/week                | Safety and tolerability<br>of long term dosing<br>with reusiran                            | Effect on serum TTR and on<br>mortality, hospitalization and 6-<br>minute walk distance (6-MWD)<br><br>Pharmacokinetics and effects on<br>cardiac biomarkers, cardiac<br>imaging, NYHA class, KCCQ,<br>and Quality of Life (EQ-5D) | New or worsening peripheral<br>neuropathy in 13 subjects typically<br>after 10 or more months on therapy.<br><br>Lactic acidosis observed in five<br>subjects.<br><br>14 stopped study drug most<br>commonly due to disease<br>progression (n=3) or death (n=5)<br>.<br>.<br><br>15(56%) had SAE but only 1<br>possibly related to study drug.<br><br>Mean knockdown of 88% |

|                     |                                           |                 |              |                                                                       |     |                                                                                                                                                    |                                                                                                                                           |                                                                                                                                                                   |                                                                                                               |
|---------------------|-------------------------------------------|-----------------|--------------|-----------------------------------------------------------------------|-----|----------------------------------------------------------------------------------------------------------------------------------------------------|-------------------------------------------------------------------------------------------------------------------------------------------|-------------------------------------------------------------------------------------------------------------------------------------------------------------------|---------------------------------------------------------------------------------------------------------------|
|                     | ATTRm<br>Cardiac<br>Amyloid               | NCT<br>02319005 | Phase 3      | Randomized,<br>Double Blind<br>Placebo<br>Controlled                  | 200 | Revusiran at 500<br>mg x 5 days, then<br>every week for 5<br>weeks vs. placebo.<br>2:1 allocation to<br>revusiran                                  | Change in 6MWT and<br>serum TTR levels                                                                                                    | Discontinued development of<br>drug                                                                                                                               | Imbalance of mortality in the<br>revusiran arm as compared to<br>placebo                                      |
| <b>Ionis TTR Rx</b> | Healthy<br>volunteers                     | <sup>20</sup>   | Phase I      | Dose ranging<br>Study                                                 | NR  | Ionis-TTR <sub>Rx</sub><br>50 – 400 mg or<br>Placebo as single or<br>multiple doses                                                                | Safety,<br>Pharmacokinetics<br>Pharmacodynamics                                                                                           | Dose-dependent reductions in<br>serum TTR with Ionis-TTR <sub>Rx</sub><br><br>Mean reduction of ~80% with<br>Ionis-TTR <sub>Rx</sub> at 300 and 400<br>mg dosing. | No SAEs reported and no significant<br>lab abnormalities.<br><br>Most common AEs were injection-<br>site pain |
|                     | ATTRm with<br>FAP                         | NCT<br>01737398 | Phase II/III | Randomized,<br>Double-Blind,<br>Placebo-<br>Controlled<br>Multicenter | 195 | Ionis TTR <sub>Rx</sub> 300mg<br>SQ TID x1 week,<br>then every week x<br>16 months vs.<br>placebo.<br>2:1 allocation to<br>Ionis-TTR <sub>Rx</sub> | Change from baseline<br>in mNIS+7 and Norfolk<br>QOL Diabetic<br>Neuropathy<br>questionnaire<br><br>Exploratory of echo<br>and NT-pro-BNP | Anticipated 2018                                                                                                                                                  | Severe thrombocytopenia with life<br>threatening bleeding reported.                                           |
|                     | ATTRm and<br>ATTRwt<br>cardiac<br>amyloid | <sup>21</sup>   | II           | Open-Label,<br>Non-randomized                                         | 20  | Ionis TTR <sub>Rx</sub> 300mg<br>SQ qweek                                                                                                          | Echo and cardiac MRI<br>measures in<br>comparison to<br>historical controls                                                               | 6 subjects completed 12 months,<br>15 subject completed 6 months,<br>1 heart transplant<br><br>No progression of strain and LV<br>mass decline of ~5%             | Well tolerated with no major SAEs.                                                                            |
|                     | ATTRm and<br>ATTRwt<br>cardiac<br>amyloid | NCT<br>02627820 | II           | Open Label<br>Non-randomized                                          | 50  | ISIS TTR Rx 300mg<br>SQ TID x1 week,<br>then every week x<br>18 months                                                                             | Systolic strain imaging<br>by echo speckle<br>tracking                                                                                    | On hold                                                                                                                                                           | N/A                                                                                                           |
|                     | ATTRm and<br>ATTRwt<br>cardiac<br>amyloid | NCT             | Phase III    | Randomized,<br>Double blind,<br>Placebo-controlled<br>Multicenter     | 490 | ISIS TTR Rx 300mg<br>SQ TID x1 wk, then<br>qweek x 16 months<br>Placebo SQ TID x<br>1wk, then qweek for<br>24 months<br>2:1 allocation to          | Death, cardiac<br>transplant or<br>cardiovascular (CV)<br>hospitalization                                                                 | On hold                                                                                                                                                           | N/A                                                                                                           |

|                            |                                 |               |          |                                                                 |    |                                                       |                                                                                                                                                                                                                  |                                                                                                                                                                       |                                                                                                                                         |
|----------------------------|---------------------------------|---------------|----------|-----------------------------------------------------------------|----|-------------------------------------------------------|------------------------------------------------------------------------------------------------------------------------------------------------------------------------------------------------------------------|-----------------------------------------------------------------------------------------------------------------------------------------------------------------------|-----------------------------------------------------------------------------------------------------------------------------------------|
|                            |                                 |               |          |                                                                 |    | ISIS-TTRrx                                            |                                                                                                                                                                                                                  |                                                                                                                                                                       |                                                                                                                                         |
| <b>Doxycycline + TUDCA</b> | ATTRmt and ATTRwt               | NCT 01171859  | Phase II | Open-label, Non-randomized Prospective Study                    | 40 | Doxycycline 100mg BID + TUDCA 250mg TID for 12 months | Response if: mBMI reduction <10% and change in NIS-LL<2 in subjects with neuropathy and mBMI reduction <10% and increase in NT-pro BNP concentration <30% or <300 pg/mL in subjects with isolated cardiomyopathy | Stable cardiac disease was observed in 75% and stable neuropathy in 46% of patients.                                                                                  | Generally well tolerated, Mild persistent skin redness<br><br>4 patients discontinued by 12 months due to gastrointestinal events.      |
|                            | TTR Cardiac Amyloid             | NCT 01855360  | Phase II | Open Label Non-randomized Prospective Study Historical Controls | 40 | Doxycycline 100mg BID + TUDCA 250mg TID for 18 months | Changes in longitudinal strain echo assessed every 6 months compared with historical controls                                                                                                                    | 30 patients (all but 3 with ATTRwt) enrolled > 12 months<br><br>Controls had greater % decline in strain that treated, p=0.006<br><br>NT-proBNP increased in treated. | 3 died, 2 technically inadequate follow-up echocardiograms, 1 had pacemaker inserted and 2 unable to tolerate therapy.                  |
|                            | Amyloid both AL, ATTm and ATTwt | NCT 01677286  | Phase II | Open Label Non-randomized Prospective study                     | 60 | Doxycycline 100 mg PO bid x 12 months                 | Composite measures specific to the organ system affected.<br><br>For cardiomyopathy: cardiac biomarkers (BNP, Troponin I), echo parameters (IVSd, longitudinal strain, diastolic indices [e/e']), ECG            | Data from 25 patients(10 AL, 6 ATTRwt, 3 ATTRm and 6 others) showed increases in BNP after 12 months, no change in troponin I; No change in IVSd, LVEF nor VO2 max    | 60% experienced dermatologic complications.<br><br>Sun hypersensitivity and GI complaints limited administration in over 30% of cohort. |
| <b>EGCG</b>                | ATTR-CM                         | <sup>22</sup> | Phase II | Open label Non-randomized Prospective                           | 19 | 500–700 mg EGCG                                       | Blood tests, echo and cardiac MRI (n = 9)                                                                                                                                                                        | No increase of LV wall thickness and mass by echo.<br>In the subgroup of patients evaluated by cardiac MRI LV mass decreased by 12.5%                                 | 2 subjects discontinued GT/GTE consumption<br>No SAEs                                                                                   |

|  |        |               |          |                                             |    |                              |                                             |                                                                                                                                |  |
|--|--------|---------------|----------|---------------------------------------------|----|------------------------------|---------------------------------------------|--------------------------------------------------------------------------------------------------------------------------------|--|
|  | ATTRwt | <sup>23</sup> | Phase II | Open label<br>Non-randomized<br>Prospective | 25 | 600 mg EGCG for<br>12 months | Blood tests, echo and<br>cardiac MRI (n=14) | Decrease in LV mass by 6%<br>p=0.03 by cMRI.<br>LVEF, LV wall thickness and<br>MAPSE by echocardiography<br>remained unchanged |  |
|--|--------|---------------|----------|---------------------------------------------|----|------------------------------|---------------------------------------------|--------------------------------------------------------------------------------------------------------------------------------|--|



## References:

1. Cibeira MT, Sanchowawala V, Seldin DC, Quillen K, Berk JL, Dember LM, Segal A, Ruberg F, Meier-Ewert H, Andrea NT, Sloan JM, Finn KT, Doros G, Blade J and Skinner M. Outcome of AL amyloidosis after high-dose melphalan and autologous stem cell transplantation: long-term results in a series of 421 patients. *Blood*. 2011;118:4346-52.
2. Landau H, Hassoun H, Rosenzweig MA, Maurer M, Liu J, Flombaum C, Bello C, Hoover E, Riedel E, Giralt S and Comenzo RL. Bortezomib and dexamethasone consolidation following risk-adapted melphalan and stem cell transplantation for patients with newly diagnosed light-chain amyloidosis. *Leukemia*. 2013;27:823-8.
3. Palladini G, Sachchithanatham S, Milani P, Gillmore J, Foli A, Lachmann H, Basset M, Hawkins P, Merlini G and Wechalekar AD. A European collaborative study of cyclophosphamide, bortezomib, and dexamethasone in upfront treatment of systemic AL amyloidosis. *Blood*. 2015;126:612-5.
4. Wechalekar AD, Goodman HJ, Lachmann HJ, Offer M, Hawkins PN and Gillmore JD. Safety and efficacy of risk-adapted cyclophosphamide, thalidomide, and dexamethasone in systemic AL amyloidosis. *Blood*. 2007;109:457-64.
5. Palladini G, Russo P, Nuvolone M, Lavatelli F, Perfetti V, Obici L and Merlini G. Treatment with oral melphalan plus dexamethasone produces long-term remissions in AL amyloidosis. *Blood*. 2007;110:787-8.
6. Berk JL, Suhr OB, Obici L, Sekijima Y, Zeldenrust SR, Yamashita T, Heneghan MA, Gorevic PD, Litchy WJ, Wiesman JF, Nordh E, Corato M, Lozza A, Cortese A, Robinson-Papp J, Colton T, Rybin DV, Bisbee AB, Ando Y, Ikeda S, Seldin DC, Merlini G, Skinner M, Kelly JW, Dyck PJ and Diflunisal Trial C. Repurposing diflunisal for familial amyloid polyneuropathy: a randomized clinical trial. *JAMA*. 2013;310:2658-67.
7. Quarta CCF, R.H. Solomon S.D. Suhr, O.B. Obici, L. Perlini S. Lindqvist, P. Koyama, J. Sekijima, Y. Zeldenrust, S.R. Yamashita, T. Horibata, Y. Miller, F. Gorevic, P. Merlini, G. Ando, Y. Ikeda, S. Ruberg, F. Berk, J.L. The prevalence of cardiac amyloidosis in familial amyloidotic polyneuropathy with predominant neuropathy: The Diflunisal Trial. *International Symposium on Amyloidosis*. 2014: p. 88-89.
8. Castano A, Helmke S, Alvarez J, Delisle S and Maurer MS. Diflunisal for ATTR cardiac amyloidosis. *Congest Heart Fail*. 2012;18:315-9.
9. Coelho T, Maia LF, Martins da Silva A, Waddington Cruz M, Plante-Bordeneuve V, Lozeron P, Suhr OB, Campistol JM, Conceicao IM, Schmidt HH, Trigo P, Kelly JW, Labaudiniere R, Chan J, Packman J, Wilson A and Grogan DR. Tafamidis for transthyretin familial amyloid polyneuropathy: a randomized, controlled trial. *Neurology*. 2012;79:785-92.
10. Coelho T, Maia LF, da Silva AM, Cruz MW, Plante-Bordeneuve V, Suhr OB, Conceicao I, Schmidt HH, Trigo P, Kelly JW, Labaudiniere R, Chan J, Packman J and Grogan DR. Long-term effects of tafamidis for the treatment of transthyretin familial amyloid polyneuropathy. *J Neurol*. 2013;260:2802-14.
11. Merlini G, Plante-Bordeneuve V, Judge DP, Schmidt H, Obici L, Perlini S, Packman J, Tripp T and Grogan DR. Effects of tafamidis on transthyretin stabilization and clinical outcomes in patients with non-Val30Met transthyretin amyloidosis. *J Cardiovasc Transl Res*. 2013;6:1011-20.
12. Maurer MS, Grogan DR, Judge DP, Mundayat R, Packman J, Lombardo I, Quyyumi AA, Aarts J and Falk RH. Tafamidis in transthyretin amyloid cardiomyopathy: effects on transthyretin stabilization and clinical outcomes. *Circ Heart Fail*. 2015;8:519-26.
13. Maurer M.S. JDP, Rosas G.R., Mandel F.S., Aarts J. Interim analysis of long-term, open-label tafamidis treatment in transthyretin amyloid cardiomyopathy after up to 5 years of treatment. *International Symposium on Amyloidosis* 2014:85-86.

14. Lozeron P, Theaudin M, Mincheva Z, Ducot B, Lacroix C, Adams D and French Network for FAP. Effect on disability and safety of Tafamidis in late onset of Met30 transthyretin familial amyloid polyneuropathy. *Eur J Neurol*. 2013;20:1539-45.
15. Coelho T, Adams D, Silva A, Lozeron P, Hawkins PN, Mant T, Perez J, Chiesa J, Warrington S, Tranter E, Munisamy M, Falzone R, Harrop J, Cehelsky J, Bettencourt BR, Geissler M, Butler JS, Sehgal A, Meyers RE, Chen Q, Borland T, Hutabarat RM, Clausen VA, Alvarez R, Fitzgerald K, Gamba-Vitalo C, Nochur SV, Vaishnav AK, Sah DW, Gollob JA and Suhr OB. Safety and efficacy of RNAi therapy for transthyretin amyloidosis. *N Engl J Med*. 2013;369:819-29.
16. J. G. Summary data from Phase II ALN-TTR02 RNAi treatment of ATTR . *IXth International Symposium on Familial Amyloidotic Polyneuropathy (IFSAP)*. 10 – 13 November 2013.
17. Coelho T SO, Conceicao I, Wadington-Cruz M, Schmidt H, Buades J , et al . . Phase 2 open-label extension study of patisiran, an investigational RNAi therapeutic for the treatment of familial amyloid polyneuropathy. . *67th Annual Meeting of the American Academy of Neurology (AAN)*. 18 – 25 April 2015.
18. Hawkins PN, Ando Y, Dispenzeri A, Gonzalez-Duarte A, Adams D and Suhr OB. Evolving landscape in the management of transthyretin amyloidosis. *Ann Med*. 2015;47:625-38.
19. Gillmore J FR, Maurer M, Hanna M. . Interim results from pilot phase 2 trial of revusiran (ALN-TTRsc). *American Heart Association Annual Meeting Scientific Sessions*. 15 – 19 November 2014.
20. Ackermann EJ, Guo S, Booten S, Alvarado L, Benson M, Hughes S and Monia BP. Clinical development of an antisense therapy for the treatment of transthyretin-associated polyneuropathy. *Amyloid*. 2012;19 Suppl 1:43-4.
21. Benson MAEaMB. Treatment of transthyretin cardiomyopathy with a TTR specific antisense oligonucleotide (IONIS-TTRrx). *International Society of Amyloidosis*. 2016.
22. Kristen AV, Lehrke S, Buss S, Mereles D, Steen H, Ehlermann P, Hardt S, Giannitsis E, Schreiner R, Haberkorn U, Schnabel PA, Linke RP, Rocken C, Wanker EE, Dengler TJ, Altland K and Katus HA. Green tea halts progression of cardiac transthyretin amyloidosis: an observational report. *Clin Res Cardiol*. 2012;101:805-13.
23. aus dem Siepen F, Bauer R, Aurich M, Buss SJ, Steen H, Altland K, Katus HA and Kristen AV. Green tea extract as a treatment for patients with wild-type transthyretin amyloidosis: an observational study. *Drug Des Devel Ther*. 2015;9:6319-25.
